# Supplementary material for: A ZIF-8@H:ZnO core–shell nanorod arrays/Si heterojunction self-powered photodetector with ultrahigh performance
Source: Royal Society of Chemistry journal article supplement (doi:10.1039/c9tc00290a), 2019-01-01
Supplement: c9tc00290a1.pdf [file c9tc00290a1.pdf]

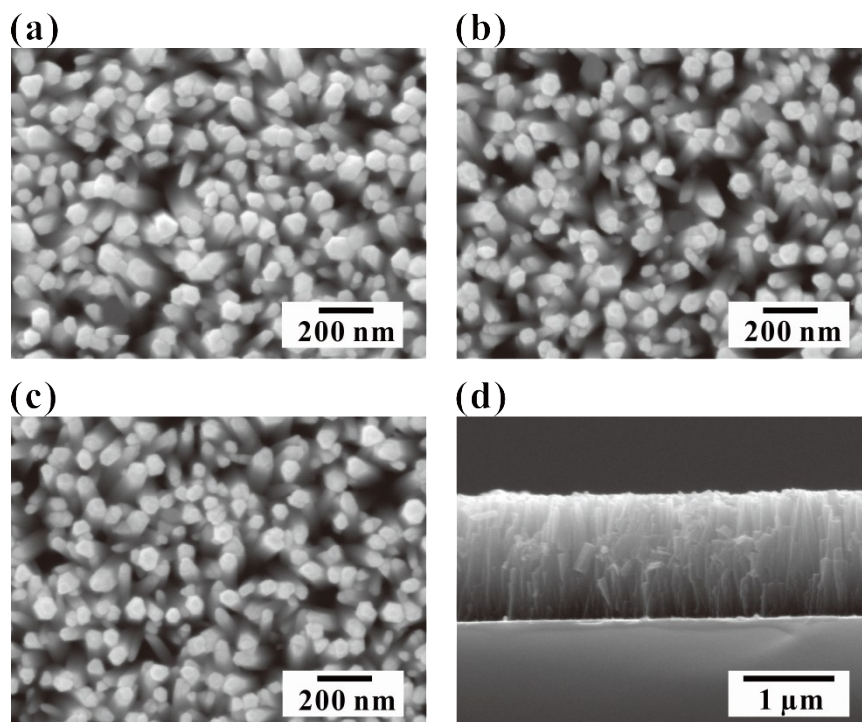

**Figure S1.** Plane-view SEM image of the (a) pristine ZnO NRs, (b) H:ZnO NRs-350 and (c) ZIF-8@H:ZnO NRs. (d) Cross-sectional SEM image of the ZnO NRs film.

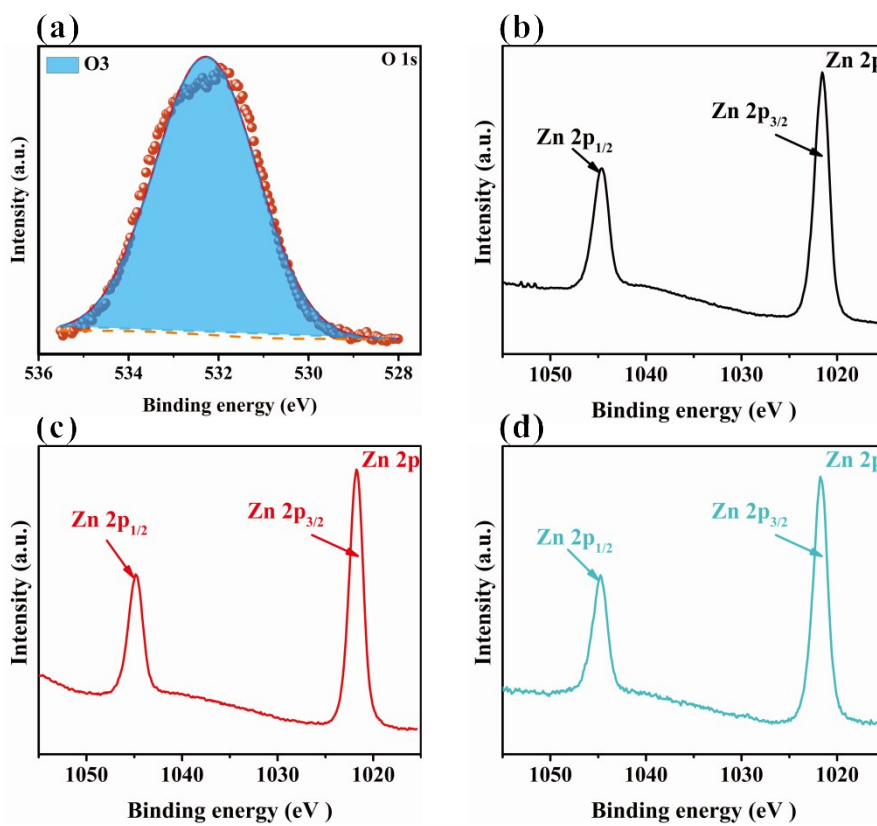

**Figure S2.** (a) XPS O 1s spectrum of ZIF-8@H:ZnO NRs. XPS Zn 2p spectrum of (b) pristine ZnO NRs, (c) H:ZnO NRs and (d) ZIF-8@H:ZnO NRs.

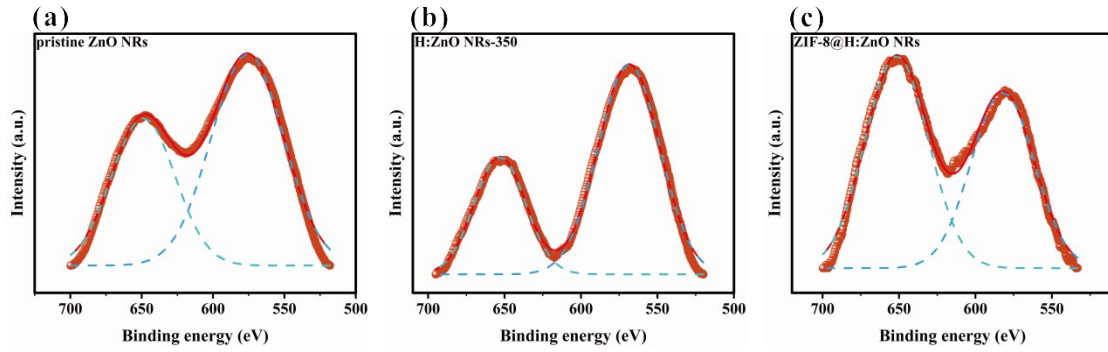

**Figure S3.** Gaussian distribution fitting curve of the Raman mode centered at (a)  $\sim 576\text{ cm}^{-1}$  and  $\sim 650\text{ cm}^{-1}$  for pristine ZnO NRs, (b)  $\sim 566\text{ cm}^{-1}$  and  $\sim 650\text{ cm}^{-1}$  for H:ZnO NRs-350 and (c)  $\sim 566\text{ cm}^{-1}$  and  $\sim 650\text{ cm}^{-1}$  for ZIF-8@H:ZnO NRs.

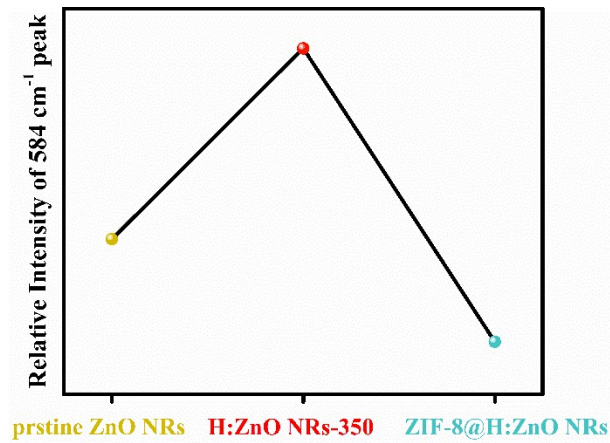

**Figure S4.** Relative intensity of  $584\text{ cm}^{-1}$  peak (oxygen vacancies) for pristine ZnO NRs, H:ZnO NRs-350 and ZIF-8@H:ZnO NRs. Relative intensity can be calculated according to the following equation: Relative intensity for X = the intensity of  $584\text{ cm}^{-1}$  peak for X/ the intensity of  $579\text{ cm}^{-1}$  peak for X, X = pristine ZnO NRs, H:ZnO NRs-350 and ZIF-8@H:ZnO NRs.

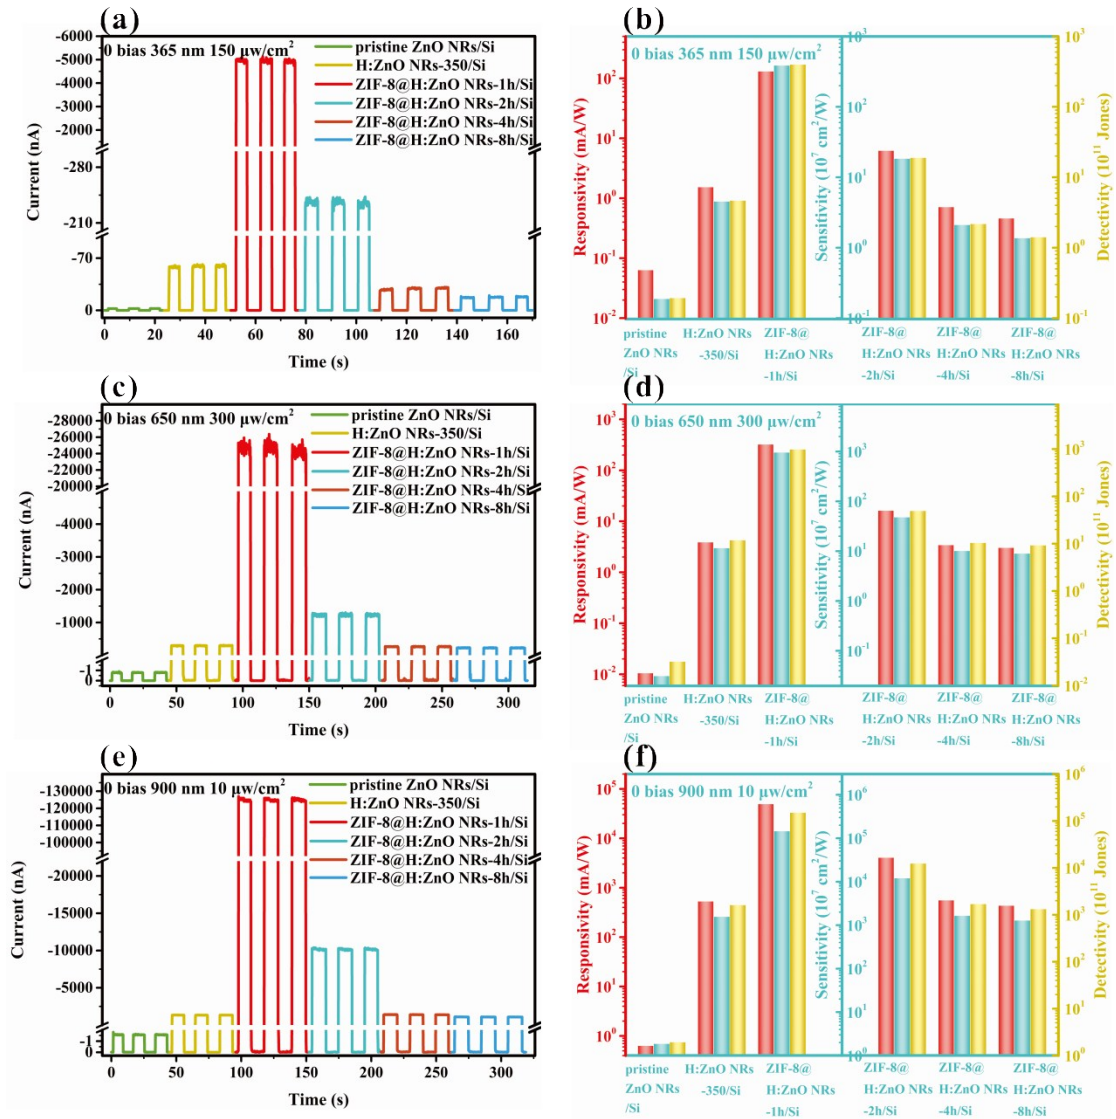

**Figure S5.** Photocurrent switching performance of the fabricated devices under periodic (a) 365 nm, (c) 650 nm, (e) 900 nm light illumination. External voltages: 0 V. The performance comparison between different devices under (b) 365 nm, (d) 650 nm, (f) 900 nm light illumination. External voltages: 0 V.

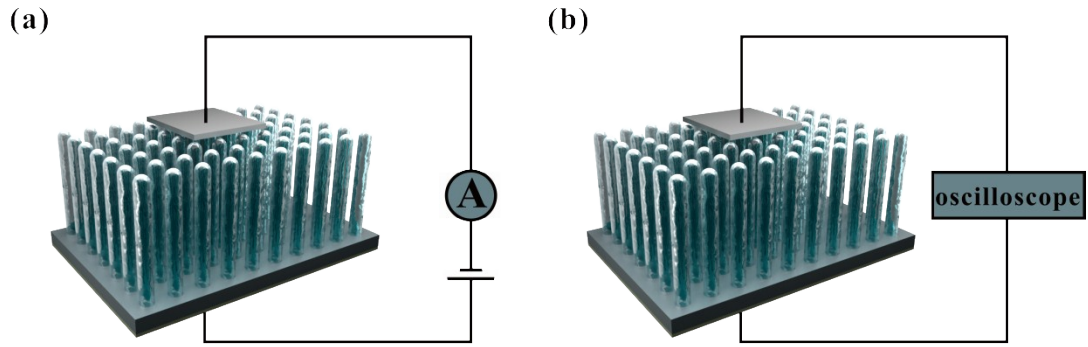

**Figure S6.** (a) Schematic illustration of the ZIF-8@H:ZnO NRs/*p*-Si heterojunction photodetector. (b) Schematic illustration of measurement circuit for measuring the response time of the device. From top to bottom the device is divided into four layers in order: Pd, ZIF-8@H:ZnO NRs, *p*-Si and In.

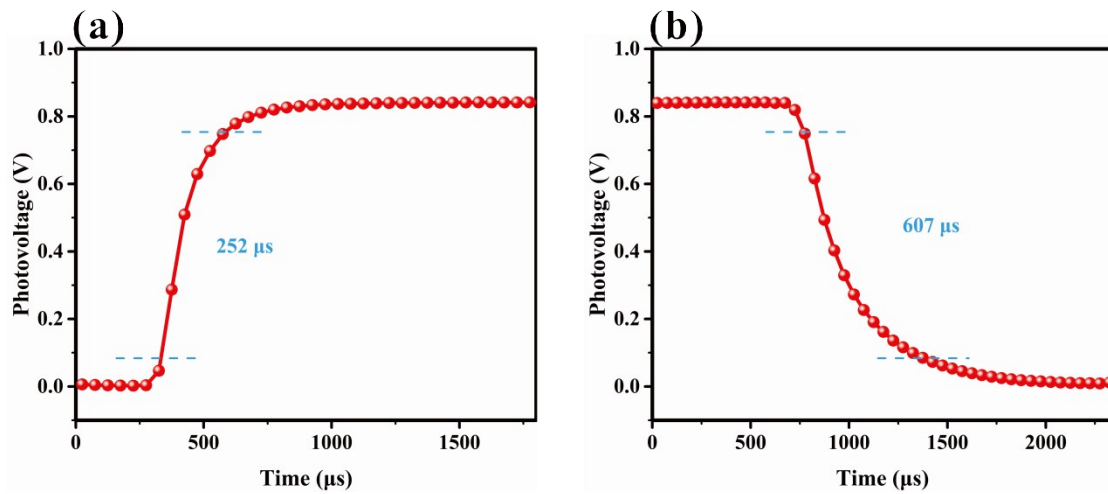

**Figure S7.** The (a) rise and (b) fall edge, respectively, of the ZIF-8@H:ZnO NRs/*p*-Si heterojunction photoresponse curve.

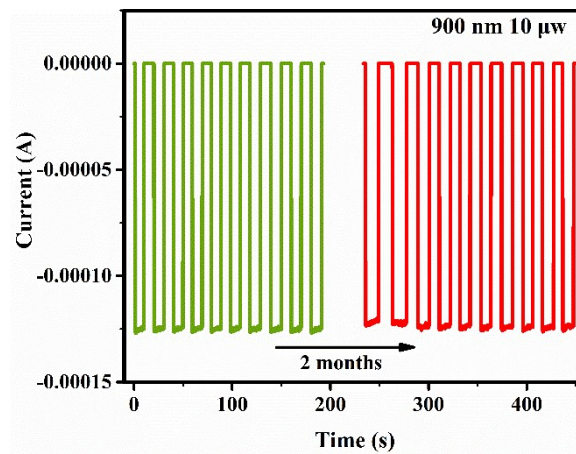

**Figure S8.** Photoresponse of the photodetector measured before and after storing in the air for 2 months under 900 nm light illumination.



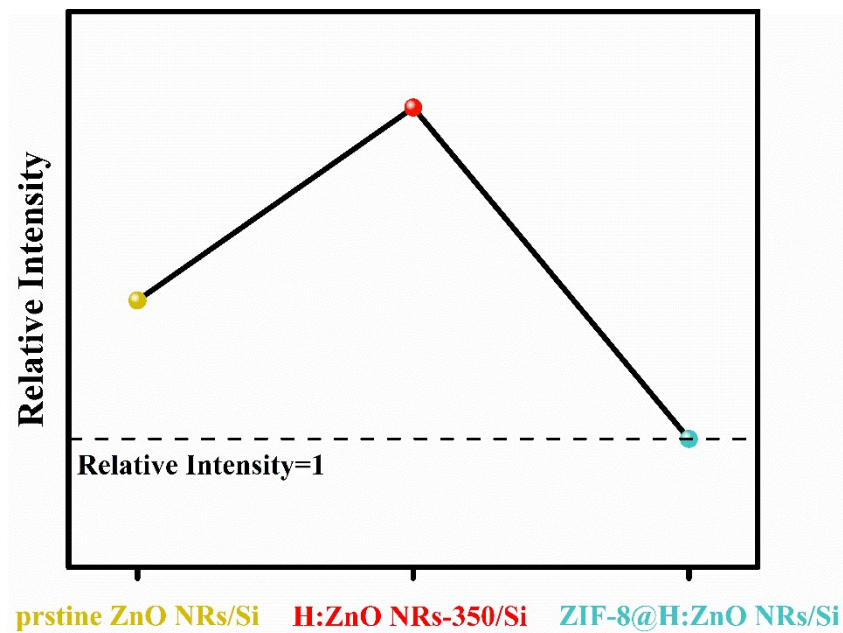

**Figure S9.** Relative intensity of EPR signal for pristine ZnO NRs/Si, H:ZnO NRs-350/Si and ZIF-8@H:ZnO NRs/Si. (Relative intensity can be calculated according to the following equation: Relative intensity for X = the intensity for X/the intensity for ZIF-8@H:ZnO NRs/Si, X = pristine ZnO NRs/Si, H:ZnO NRs-350/Si and ZIF-8@H:ZnO NRs/Si.)

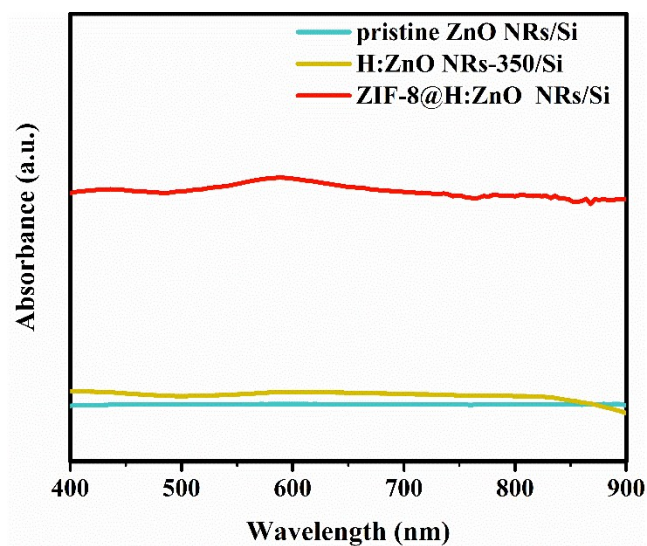

**Figure S10.** The absorption spectra of pristine ZnO NRs/Si, H:ZnO NRs-350/Si and ZIF-8@H:ZnO NRs/Si respectively.

Table S1. Performance comparison of our ZIF-8@H:ZnO NRs/Si heterojunction self-powered photodetector with previous reported ZnO-based self-powered devices.

| Photodetector                                    | Type           | $\lambda$ (nm) | Responsivity (mA/W)   | Detectivity (Jones)   | $T_r/T_d$ (ms) | Ref. |
|--------------------------------------------------|----------------|----------------|-----------------------|-----------------------|----------------|------|
| H:VZnO nanoflakes/<br>PEDOT:PSS                  | p-n            | 365            | 2.65                  | $5.25 \times 10^{10}$ | 23/26          | 1    |
| ZnO/graphene/Cu <sub>2</sub> O                   | p-g-n          | 365            | 21.2                  |                       | 6/6            | 2    |
| Cl-ZnO nanorods<br>/DMSO-PEDOT:<br>PSS           | p-n            | 365            | 0.80                  | $1.12 \times 10^{10}$ | 30/32          | 3    |
| ZnO/ZnS                                          | n-n            | 340            | 56                    |                       | 40/40          | 4    |
| ZnO homojunction<br>nanofibers                   | p-n            | 360            | 1                     |                       | 3900/4700      | 5    |
| ZnO nanorods<br>/RGO                             | p-n            | 365            |                       |                       | 100/200        | 6    |
| ZnO/Spiro-<br>MeOTAD                             | p-n            | 365            | 0.8                   | $4.2 \times 10^9$     | 160/200        | 7    |
| Ga:ZnO nanorods<br>/p-GaN                        | p-n            | 365            | 230                   | $2.32 \times 10^{12}$ |                | 8    |
| Pt/Al <sub>2</sub> O <sub>3</sub> /ZnO           | MIS            | Xe lamp        | $1.78 \times 10^{-3}$ | $7.99 \times 10^7$    | 100/100        | 9    |
| CuSCN/ZnO<br>nanorods                            | p-n            | 365            | 22.5                  |                       | 3200/3840      | 10   |
| Au/MoO <sub>3</sub> /Perovskite<br>/ZnO nanorods | heterojunction | 500            | $2.43 \times 10^4$    | $3.56 \times 10^{14}$ | 700/600        | 11   |
| Pd/ZnO/Al                                        | MSM            | 370            | 230                   |                       | 10/10          | 12   |
| Graphene/ZnO<br>nanowires/graphene               | MSM            | 365            | 0.54                  |                       |                | 13   |

| Photodetector                      | Type     | $\lambda$ (nm) | Responsivity<br>(mA/W) | Detectivity<br>(Jones)  | $T_r/T_d$ (ms)         | Ref. |
|------------------------------------|----------|----------------|------------------------|-------------------------|------------------------|------|
| ZnO nanorods<br>/p-Si              | p-n      | 395            |                        |                         | 25/22                  | 14   |
| Au/ZnO/Au                          | MSM      | 365            | 30                     |                         | 0.71 $\mu$ s/4 $\mu$ s | 15   |
| Graphene/ZnO:Al<br>nanorods        | Schottky | 380            | 39                     |                         | 0.037/0.33             | 16   |
| P3HT/ZnO<br>nanowires              | p-n      | 365            | 0.125                  | $3.7 \times 10^7$       | 100/100                | 17   |
| ZnO/NiO                            | p-n      | 372            | 0.493                  |                         | 1.38 $\mu$ s           | 18   |
| Cl:ZnO nanorods<br>/PEDOT:PSS      | p-n      | 365            | 2.3354                 | $1.5414 \times 10^{10}$ | 28/23                  | 19   |
| ZnO/Ga <sub>2</sub> O <sub>3</sub> | n-n      | 251            | 9.7                    | $6.29 \times 10^{12}$   | 0.1/0.9                | 20   |
| ZnO/CNTs                           | Schottky | 325            | $2.75 \times 10^4$     |                         | 0.48/0.65              | 21   |
| ZnO nanowires/<br>CuSCN            | p-n      | 370            | 20                     |                         |                        | 22   |
| ZnO nanowires<br>/Si               | p-n      | 1064           | 220                    |                         | 15 $\mu$ s/21 $\mu$ s  | 23   |
| Pt/ZnO                             | Schottky | 365            | 1.82                   |                         | 81/95                  | 24   |
| ZnO/Cu <sub>2</sub> O              | p-n      |                | $7.7 \times 10^{-3}$   |                         | 90/90                  | 25   |
| Graphene/ZnO<br>/n-Si              | g-n-n    | 488            | 500                    |                         | 0.28/0.54              | 26   |
| ZnO/p-Si                           | p-n      | 450            |                        |                         | 130                    | 27   |

| Photodetector                                     | Type           | $\lambda$ (nm) | Responsivity (mA/W) | Detectivity (Jones)    | $T_r/T_d$ (ms) | Ref.      |
|---------------------------------------------------|----------------|----------------|---------------------|------------------------|----------------|-----------|
| $\beta$ -Ga <sub>2</sub> O <sub>3</sub> /Ga:ZnO   | n-n            | 254            | 0.763               |                        | 179/272        | 28        |
| ZnO/Spiro-MeOTAD                                  | p-n            | 390            | 17                  |                        | 0.2/0.95       | 29        |
|                                                   |                | 470            | 6.5                 |                        | 4/10           |           |
| Au/ZnO                                            | Schottky       | 325            |                     |                        | 10/10          | 30        |
| ZnO/MgO/GaN                                       | p-i-n          | 350            | 320                 | $8.0 \times 10^{12}$   |                | 31        |
| Perovskite/ZnO nanoparticles                      | heterojunction | 405            | 11.5                |                        | 409/17.92      | 32        |
| Au/ $\alpha$ -Ga <sub>2</sub> O <sub>3</sub> /ZnO | Schottky+n-n   | 230            | 3.42                | $9.66 \times 10^{12}$  |                | 33        |
| ZnO nanowires/PEDOT:PSS                           | p-n            | 325            | 3.5                 | $7.5 \times 10^9$      | 5.8/7.3        | 34        |
| ZnO nanowires/PVK                                 | p-n            | 325            | 9.96                |                        | 1500/6000      | 35        |
| Perovskite/ZnO                                    | heterojunction | 325            | 26.7                | $4.0 \times 10^{10}$   | 0.053/0.063    | 36        |
| ZnO/Se                                            | p-n            | 370            | 2.56                |                        | 0.69/13.5      | 37        |
| ZnO/CuCrO <sub>2</sub> nanowires                  | p-n            | 395            | 5.87                |                        | 0.032/0.035    | 38        |
| ZIF-8@H:ZnO NRs/Si                                | p-n            | 365            | 209.6               | $6.354 \times 10^{13}$ | 0.252/0.607    | This work |
|                                                   |                | 650            | 536                 | $1.625 \times 10^{14}$ |                |           |



| Photodetector         | Type | $\lambda$ (nm) | Responsivity<br>(mA/W) | Detectivity<br>(Jones) | $T_r/T_d$ (ms) | Ref.         |
|-----------------------|------|----------------|------------------------|------------------------|----------------|--------------|
| ZIF-8@H:ZnO<br>NRs/Si | p-n  | 900            | $7.07 \times 10^4$     | $2.142 \times 10^{16}$ | 0.252/0.607    | This<br>work |

## REFERENCE

1. B. Deka Boruah and A. Misra, *ACS Appl Mater Interfaces*, 2016, 8, 18182-18188.
2. Z. Bai, J. Liu, F. Liu and Y. Zhang, *Journal of Alloys and Compounds*, 2017, 726, 803-809.
3. B. D. Boruah, S. N. Majji and A. Misra, *Nanoscale*, 2017, 9, 4536-4543.
4. H. Lin, L. Wei, C. Wu, Y. Chen, S. Yan, L. Mei and J. Jiao, *Nanoscale research letters*, 2016, 11, 420.
5. Y. Ning, Z. Zhang, F. Teng and X. Fang, *Small*, 2018, DOI: 10.1002/sml.201703754, 1703754.
6. H. Yang, J. Li, D. Yu and L. Li, *Crystal Growth & Design*, 2016, 16, 4831-4838.
7. Y. Shen, X. Yan, H. Si, P. Lin, Y. Liu, Y. Sun and Y. Zhang, *ACS Appl Mater Interfaces*, 2016, 8, 6137-6143.
8. L. Yang, H. Zhou, M. Xue, Z. Song and H. Wang, *Sensors and Actuators A: Physical*, 2017, 267, 76-81.
9. Z. Zhang, Q. Liao, Y. Yu, X. Wang and Y. Zhang, *Nano Energy*, 2014, 9, 237-244.
10. Y. Zhang, J. Xu, S. Shi, Y. Gao, C. Wang, X. Zhang, S. Yin and L. Li, *ACS Appl Mater Interfaces*, 2016, 8, 22647-22657.
11. J. Yu, X. Chen, Y. Wang, H. Zhou, M. Xue, Y. Xu, Z. Li, C. Ye, J. Zhang, P. A. van Aken, P. D. Lund and H. Wang, *Journal of Materials Chemistry C*, 2016, 4, 7302-7308.
12. M. Husham, M. N. Hamidon, S. Paiman, A. A. Abuelsamen, O. F. Farhat and A. A. Al-Dulaimi, *Sensors and Actuators A: Physical*, 2017, 263, 166-173.
13. B. D. Boruah, A. Mukherjee and A. Misra, *Nanotechnology*, 2016, 27, 095205.
14. J. J. Hassan, M. A. Mahdi, S. J. Kasim, N. M. Ahmed, H. Abu Hassan and Z. Hassan, *Applied Physics Letters*, 2012, 101, 261108.
15. H.-Y. Chen, K.-W. Liu, X. Chen, Z.-Z. Zhang, M.-M. Fan, M.-M. Jiang, X.-H. Xie, H.-F. Zhao and D.-Z. Shen, *J. Mater. Chem. C*, 2014, 2, 9689-9694.
16. L. Duan, F. He, Y. Tian, B. Sun, J. Fan, X. Yu, L. Ni, Y. Zhang, Y. Chen and W. Zhang, *ACS Appl Mater Interfaces*, 2017, 9, 8161-8168.
17. B. Ouyang, K. Zhang and Y. Yang, *Advanced Materials Technologies*, 2017, 2, 1700208.
18. P.-N. Ni, C.-X. Shan, S.-P. Wang, X.-Y. Liu and D.-Z. Shen, *Journal of Materials Chemistry C*, 2013, 1, 4445.
19. B. Deka Boruah, S. Naidu Majji, S. Nandi and A. Misra, *Nanoscale*, 2018, 10, 3451-3459.
20. B. Zhao, F. Wang, H. Chen, L. Zheng, L. Su, D. Zhao and X. Fang, *Advanced Functional*

- Materials*, 2017, 27, 1700264.
21. C.-H. Lin, H.-C. Fu, D.-H. Lien, C.-Y. Hsu and J.-H. He, *Nano Energy*, 2018, 51, 294-299.
  22. J. Garnier, R. Parize, E. Appert, O. Chaix-Pluchery, A. Kaminski-Cachopo and V. Consonni, *ACS Appl Mater Interfaces*, 2015, 7, 5820-5829.
  23. X. Wang, Y. Dai, R. Liu, X. He, S. Li and Z. L. Wang, *ACS Nano*, 2017, 11, 8339-8345.
  24. Z. Bai, X. Chen, X. Yan, X. Zheng, Z. Kang and Y. Zhang, *Physical chemistry chemical physics : PCCP*, 2014, 16, 9525-9529.
  25. P. Ghamgosar, F. Rigoni, S. You, I. Dobryden, M. G. Kohan, A. L. Pellegrino, I. Concina, N. Almqvist, G. Malandrino and A. Vomiero, *Nano Energy*, 2018, 51, 308-316.
  26. C.-C. Cheng, J.-Y. Zhan, Y.-M. Liao, T.-Y. Lin, Y.-P. Hsieh and Y.-F. Chen, *Applied Physics Letters*, 2016, 109, 053501.
  27. B. Yin, Y. Qiu, H. Zhang, Y. Luo, Y. Zhao, D. Yang and L. Hu, *Semicond. Sci. Technol.*, 2017, 32, 064002.
  28. Z. Wu, L. Jiao, X. Wang, D. Guo, W. Li, L. Li, F. Huang and W. Tang, *Journal of Materials Chemistry C*, 2017, 5, 8688-8693.
  29. O. Game, U. Singh, T. Kumari, A. Banpurkar and S. Ogale, *Nanoscale*, 2014, 6, 503-513.
  30. S. Lu, J. Qi, S. Liu, Z. Zhang, Z. Wang, P. Lin, Q. Liao, Q. Liang and Y. Zhang, *ACS Appl Mater Interfaces*, 2014, 6, 14116-14122.
  31. H. Zhou, P. Gui, Q. Yu, J. Mei, H. Wang and G. Fang, *Journal of Materials Chemistry C*, 2015, 3, 990-994.
  32. C. Li, C. Han, Y. Zhang, Z. Zang, M. Wang, X. Tang and J. Du, *Sol. Energy Mater. Sol. Cells*, 2017, 172, 341-346.
  33. X. Chen, Y. Xu, D. Zhou, S. Yang, F. F. Ren, H. Lu, K. Tang, S. Gu, R. Zhang, Y. Zheng and J. Ye, *ACS Appl Mater Interfaces*, 2017, 9, 36997-37005.
  34. W. Peng, X. Wang, R. Yu, Y. Dai, H. Zou, A. C. Wang, Y. He and Z. L. Wang, *Advanced materials*, 2017, 29.
  35. Y. Dong, Y. Zou, J. Song, Z. Zhu, J. Li and H. Zeng, *Nano Energy*, 2016, 30, 173-179.
  36. Z. Wang, R. Yu, C. Pan, Z. Li, J. Yang, F. Yi and Z. L. Wang, *Nature communications*, 2015, 6, 8401.
  37. K. Hu, F. Teng, L. Zheng, P. Yu, Z. Zhang, H. Chen and X. Fang, *Laser & Photonics Reviews*, 2017, 11, 1600257.
  38. T. Cossuet, J. Resende, L. Rapenne, O. Chaix-Pluchery, C. Jiménez, G. Renou, A. J. Pearson, R. L. Z. Hoye, D. Blanc-Pelissier, N. D. Nguyen, E. Appert, D. Muñoz-Rojas, V. Consonni and J.-L. Deschanvres, *Advanced Functional Materials*, 2018, DOI: 10.1002/adfm.201803142, 1803142.

Table S2. Performance comparison of our ZIF-8@H:ZnO NRs/Si heterojunction self-powered photodetector with other previous reported self-powered devices.

| Photodetector                                       | Type                            | $\lambda$ (nm) | Responsivity (mA/W) | Detectivity (Jones)   | $T_r/T_d$ (ms) | Ref. |
|-----------------------------------------------------|---------------------------------|----------------|---------------------|-----------------------|----------------|------|
| Graphene/Si                                         | Schottky                        | 532            | 510                 |                       | 0.13/0.135     | 1    |
| Au/InSe                                             | Schottky                        | 365            | 369                 |                       |                | 2    |
|                                                     |                                 | 685            | 244                 |                       | 23/25          |      |
| Au/PS-MAPbI <sub>3</sub>                            | Schottky                        | 710            | 610                 | $1.5 \times 10^{13}$  | 13/14          | 3    |
| Diamond/<br>$\beta$ -Ga <sub>2</sub> O <sub>3</sub> | p-n                             | 244            | 0.2                 | $6.9 \times 10^9$     |                | 4    |
| NiO/TiO <sub>2</sub> NRs                            | p-n                             | 380            | 1.34                | $5.92 \times 10^{11}$ | 100/100        | 5    |
| NiO/TiO <sub>2</sub> NRs<br>/TiO <sub>x</sub>       |                                 |                | 5.66                | $2.5 \times 10^{12}$  |                |      |
| Ag/Graphene<br>/GaAs                                | van der Waals<br>heterojunction | 405            | 210                 | $2.98 \times 10^{13}$ |                | 6    |
| PtSe <sub>2</sub> /Perovskite                       | Schottky                        | 808            | 117.7               | $2.91 \times 10^{12}$ | 78/60 ns       | 7    |
| CdS NRs/RGO                                         | Schottky                        | 530            | 0.58                | $7.2 \times 10^{11}$  | 1.3/1.7        | 8    |
| MoTe <sub>2</sub> /MoS <sub>2</sub>                 | Van der Waals<br>heterojunction | 637            | 46                  |                       | 0.06           | 9    |
| GaSe/WS <sub>2</sub>                                | p-n                             | 350            | 90                  |                       | 37/43 $\mu$ s  | 10   |
| Au/Perovskite                                       | Schottky                        | 650            |                     |                       | 45/91 ns       | 11   |

| Photodetector                                              | Type           | $\lambda$ (nm) | Responsivity (mA/W) | Detectivity (Jones)   | $T_r/T_d$ (ms)   | Ref. |
|------------------------------------------------------------|----------------|----------------|---------------------|-----------------------|------------------|------|
| TiO <sub>2</sub> /graphene<br>/Perovskite                  | heterojunction | 530            | 0.375               | $4.5 \times 10^{11}$  | 5/5              | 12   |
| Graphene/Si                                                | Schottky       | 750            | 400                 | $5.4 \times 10^{12}$  | 6.7/8.6          | 13   |
| MoS <sub>2</sub> /GaAs                                     | heterojunction | 635            | 419                 | $1.9 \times 10^{14}$  | 0.017/0.031      | 14   |
| RGO/Si                                                     | p-n            | 600            | 1520                |                       | 2/3.7            | 15   |
| GaN/SiO <sub>2</sub><br>/MoS <sub>2</sub>                  | heterojunction | 633            |                     |                       | 400/350          | 16   |
| RGO-MoS <sub>2</sub> /<br>pyramid Si                       | heterojunction | 808            | $2.18 \times 10^4$  | $3.8 \times 10^{15}$  | 2.8/46.6 $\mu$ s | 17   |
| MoS <sub>2</sub> /Perovskite                               | heterojunction | white<br>light | 60                  |                       | 2149/899         | 18   |
| GaN microwires<br>array/Si                                 | p-n            | 325            | 131                 | $3.4 \times 10^{12}$  | 2/2              | 19   |
|                                                            |                | 700            | 310                 | $9.5 \times 10^{12}$  | 8/8              |      |
|                                                            |                | 825            | 474                 | $3.4 \times 10^{12}$  | 9/8              |      |
| CsPbBr <sub>3</sub> -<br>Cs <sub>4</sub> PbBr <sub>6</sub> | heterojunction | 254            | 49.4                | $1.2 \times 10^{12}$  | 7.8/33.6 $\mu$ s | 20   |
| Bi <sub>2</sub> Se <sub>3</sub> /Si                        | heterojunction | 808            | $2.6 \times 10^3$   | $4.39 \times 10^{12}$ | 2.5/5.5 $\mu$ s  | 21   |
| TiN:PPA                                                    | hybrid         | 570            | 570                 | $1.92 \times 10^{11}$ | 9.23/18.12       | 22   |
| MoO <sub>3-x</sub> /Si                                     | n-n            | 900            |                     | $6.29 \times 10^{12}$ | 1/51.4 $\mu$ s   | 23   |

| Photodetector                                 | Type           | $\lambda$ (nm) | Responsivity (mA/W) | Detectivity (Jones)    | $T_r/T_d$ (ms) | Ref.      |
|-----------------------------------------------|----------------|----------------|---------------------|------------------------|----------------|-----------|
| $\gamma$ -In <sub>2</sub> Se <sub>3</sub> /Si | p-n            | 820            | 800                 |                        | 0.175/0.226    | 24        |
| CuO/Si nanowires                              | p-n            | 405            | 0.389               | $3.00 \times 10^9$     | 60/80 $\mu$ s  | 25        |
|                                               |                | 532            | 0.105               | $1.00 \times 10^9$     |                |           |
|                                               |                | 1064           | 0.064               | $7.60 \times 10^9$     |                |           |
| MoS <sub>2</sub> /Si                          | p-n            | 808            | 300                 | $10^{13}$              | 3/40 $\mu$ s   | 26        |
| C Quantum dots/Si nanowires                   | heterojunction | 600            | 353                 | $3.79 \times 10^9$     | 20/40 $\mu$ s  | 27        |
| Se/TiO <sub>2</sub> nanotubes                 | p-n            | 620            | 100                 | $6.2 \times 10^{12}$   | 1.4/7.8        | 28        |
| SnTe/Si                                       | heterojunction | 808            | 128                 | $8.4 \times 10^{12}$   | 8/390 $\mu$ s  | 29        |
| ZIF-8@H:ZnO nanorods/Si                       | p-n            | 365            | 209.6               | $6.354 \times 10^{13}$ | 0.252/0.607    | This work |
|                                               |                | 650            | 536                 | $1.625 \times 10^{14}$ |                |           |
|                                               |                | 900            | $7.07 \times 10^4$  | $2.142 \times 10^{16}$ |                |           |

## REFERENCE

1. D. Periyagounder, P. Gnanasekar, P. Varadhan, J.-H. He and J. Kulandaivel, *Journal of Materials Chemistry C*, 2018, 6, 9545-9551.
2. M. Dai, H. Chen, R. Feng, W. Feng, Y. Hu, H. Yang, G. Liu, X. Chen, J. Zhang, C. Y. Xu and P. Hu, *ACS Nano*, 2018, 12, 8739-8747.
3. R. Saraf and V. Maheshwari, *ACS Appl Mater Interfaces*, 2018, 10, 21066-21072.
4. Y.-C. Chen, Y.-J. Lu, C.-N. Lin, Y.-Z. Tian, C.-J. Gao, L. Dong and C.-X. Shan, *Journal of*

- Materials Chemistry C*, 2018, 6, 5727-5732.
5. Y. Gao, J. Xu, S. Shi, H. Dong, Y. Cheng, C. Wei, X. Zhang, S. Yin and L. Li, *ACS Appl Mater Interfaces*, 2018, DOI: 10.1021/acsami.7b18815.
  6. Y. Lu, S. Feng, Z. Wu, Y. Gao, J. Yang, Y. Zhang, Z. Hao, J. Li, E. Li, H. Chen and S. Lin, *Nano Energy*, 2018, DOI: 10.1016/j.nanoen.2018.02.056.
  7. Z. X. Zhang, Z. Long-Hui, X. W. Tong, Y. Gao, C. Xie, Y. H. Tsang, L. B. Luo and Y. C. Wu, *J. Phys. Chem. Lett.*, 2018, 9, 1185-1194.
  8. X.-X. Yu, H. Yin, H.-X. Li, H. Zhao, C. Li and M.-Q. Zhu, *Journal of Materials Chemistry C*, 2018, 6, 630-636.
  9. Y. Chen, X. Wang, G. Wu, Z. Wang, H. Fang, T. Lin, S. Sun, H. Shen, W. Hu, J. Wang, J. Sun, X. Meng and J. Chu, *Small*, 2018, 14.
  10. Q. Lv, F. Yan, X. Wei and K. Wang, *Advanced Optical Materials*, 2018, 6, 1700490.
  11. F.-X. Liang, J.-Z. Wang, Z.-X. Zhang, Y.-Y. Wang, Y. Gao and L.-B. Luo, *Advanced Optical Materials*, 2017, 5, 1700654.
  12. J. Li, S. Yuan, G. Tang, G. Li, D. Liu, J. Li, X. Hu, Y. Liu, J. Li, Z. Yang, S. F. Liu, Z. Liu, F. Gao and F. Yan, *ACS Appl Mater Interfaces*, 2017, 9, 42779-42787.
  13. D. Xiang, C. Han, Z. Hu, B. Lei, Y. Liu, L. Wang, W. P. Hu and W. Chen, *Small*, 2015, 11, 4829-4836.
  14. Z. Xu, S. Lin, X. Li, S. Zhang, Z. Wu, W. Xu, Y. Lu and S. Xu, *Nano Energy*, 2016, 23, 89-96.
  15. G. Li, L. Liu, G. Wu, W. Chen, S. Qin, Y. Wang and T. Zhang, *Small*, 2016, 12, 5019-5026.
  16. P. Perumal, C. Karuppiyah, W. C. Liao, Y. R. Liou, Y. M. Liao and Y. F. Chen, *Scientific reports*, 2017, 7, 10002.
  17. P. Xiao, J. Mao, K. Ding, W. Luo, W. Hu, X. Zhang, X. Zhang and J. Jie, *Advanced materials*, 2018, DOI: 10.1002/adma.201801729, e1801729.
  18. F. Bai, J. Qi, F. Li, Y. Fang, W. Han, H. Wu and Y. Zhang, *Advanced Materials Interfaces*, 2018, 5, 1701275.
  19. W. Song, X. Wang, H. Chen, D. Guo, M. Qi, H. Wang, X. Luo, X. Luo, G. Li and S. Li, *Journal of Materials Chemistry C*, 2017, 5, 11551-11558.
  20. G. Tong, H. Li, Z. Zhu, Y. Zhang, L. Yu, J. Xu and Y. Jiang, *The Journal of Physical Chemistry Letters*, 2018, DOI: 10.1021/acs.jpcclett.8b00429, 1592-1599.
  21. H. Zhang, X. Zhang, C. Liu, S. T. Lee and J. Jie, *ACS Nano*, 2016, 10, 5113-5122.
  22. A. A. Hussain, B. Sharma, T. Barman and A. R. Pal, *ACS Appl Mater Interfaces*, 2016, 8, 4258-4265.
  23. C. Zhao, Z. Liang, M. Su, P. Liu, W. Mai and W. Xie, *ACS Appl Mater Interfaces*, 2015, 7, 25981-25990.
  24. S. Chen, X. Liu, X. Qiao, X. Wan, K. Shehzad, X. Zhang, Y. Xu and X. Fan, *Small*, 2017, 13.
  25. Q. Hong, Y. Cao, J. Xu, H. Lu, J. He and J. L. Sun, *ACS Appl Mater Interfaces*, 2014, 6, 20887-20894.
  26. L. Wang, J. Jie, Z. Shao, Q. Zhang, X. Zhang, Y. Wang, Z. Sun and S.-T. Lee, *Advanced Functional Materials*, 2015, 25, 2910-2919.
  27. C. Xie, B. Nie, L. Zeng, F.-X. Liang, M.-Z. Wang, L. Luo, M. Feng, Y. Yu, C.-Y. Wu and Y. Wu, *Acs Nano*, 2014, 8, 4015-4022.
  28. L. Zheng, K. Hu, F. Teng and X. Fang, *Small*, 2017, 13.
  29. S. Gu, K. Ding, J. Pan, Z. Shao, J. Mao, X. Zhang and J. Jie, *Journal of Materials Chemistry*

*A*, 2017, 5, 11171-11178.
